# Supplementary material for: Research protocol to evaluate the effectiveness of shockwave therapy, photobiomodulation and physical therapy in the management of non-insertional Achilles tendinopathy in runners: a randomised control trial with elective cross-over design
Source: HighWire-hosted journal article supplement (doi:10.1136/bmjsem-2022-001397), 2022-09-01
Supplement: bmjsem-2022-001397supp001_data_supplement.pdf [file bmjsem-2022-001397supp001_data_supplement.pdf]

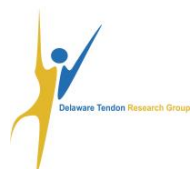

# Training Diary

Subject ID: \_\_\_\_\_ Start date: \_\_\_\_\_ Week #: \_\_\_\_\_

| Date | Home exercises<br>(include which exercise, reps,<br>sets and load) | Running<br>and/or<br>Jumping | Physical activity | Pain level 0-10<br>0=no pain<br>10=worst pain imaginable          |
|------|--------------------------------------------------------------------|------------------------------|-------------------|-------------------------------------------------------------------|
|      |                                                                    | Yes _____<br>No _____        |                   | Morning: _____<br>Today's lowest: _____<br>Today's highest: _____ |
|      |                                                                    | Yes _____<br>No _____        |                   | Morning: _____<br>Today's lowest: _____<br>Today's highest: _____ |
|      |                                                                    | Yes _____<br>No _____        |                   | Morning: _____<br>Today's lowest: _____<br>Today's highest: _____ |
|      |                                                                    | Yes _____<br>No _____        |                   | Morning: _____<br>Today's lowest: _____<br>Today's highest: _____ |
|      |                                                                    | Yes _____<br>No _____        |                   | Morning: _____<br>Today's lowest: _____<br>Today's highest: _____ |
|      |                                                                    | Yes _____<br>No _____        |                   | Morning: _____<br>Today's lowest: _____<br>Today's highest: _____ |
|      |                                                                    | Yes _____<br>No _____        |                   | Morning: _____<br>Today's lowest: _____<br>Today's highest: _____ |
